# Supplementary material
Source: Springer Nature journal article supplement (https://www.springerprofessional.de/resource/supplementary/13638_2013_734_MOESM5_ESM.pdf/11898370)

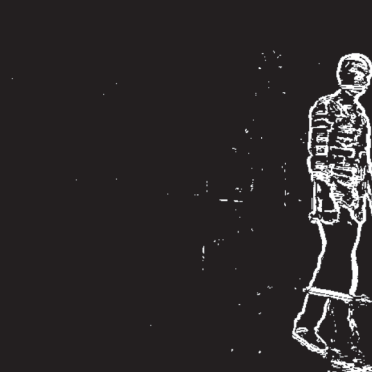

(a)

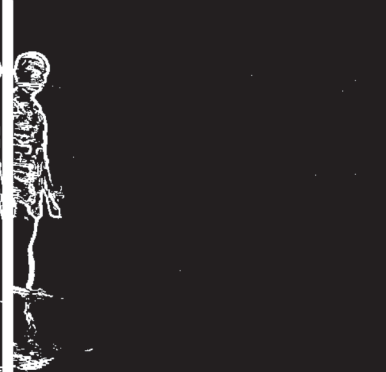

(b)

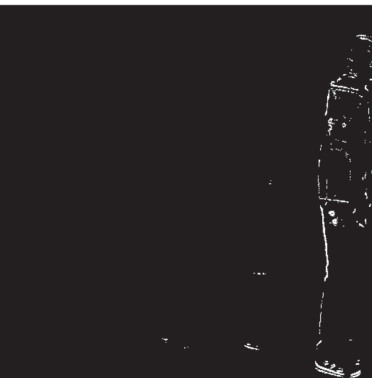

(c)

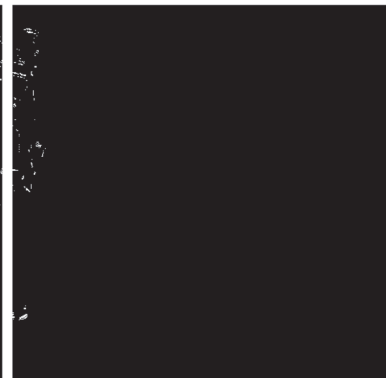

(d)

Supplement: MOESM5 [file 11898370]
